# Supplementary material for: Pulmonary artery pressure monitoring in chronic heart failure: effects across clinically relevant subgroups in the MONITOR-HF trial
Source: PubMed Central journal article supplement (PMC11335373; doi:10.1093/eurheartj/ehae323), 2024-05-11
Supplement: ehae323_supplementary_data.pdf [file ehae323_supplementary_data.pdf]

## Supplementary material

Figure S1. Total heart failure hospitalizations and all-cause mortality.

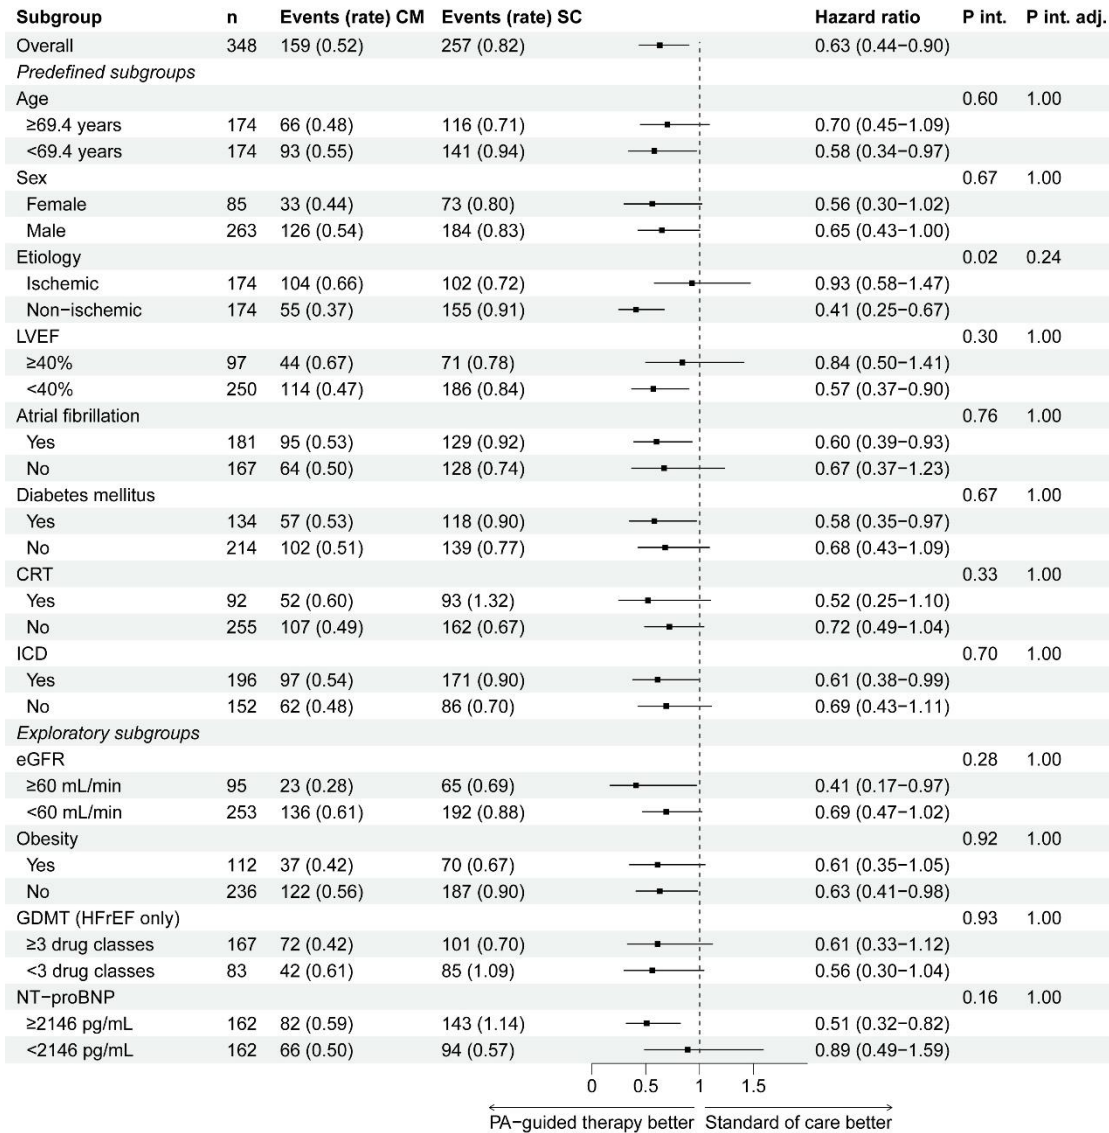

Rate: events/patient-year; CM: CardiMEMS (PA-guided therapy) group; SC: standard of care group; P int: P interaction; P int adj: Pinteraction adjusted; LVEF: left ventricular ejection fraction; CRT: cardiac resynchronization therapy; ICD: implantable cardiac defibrillator; eGFR: estimated glomerular filtration rate; GDMT: guideline-directed medical therapy; HFrEF: heart failure with a reduced ejection fraction.

Figure S2. Time to first heart failure hospitalization or cardiovascular mortality.

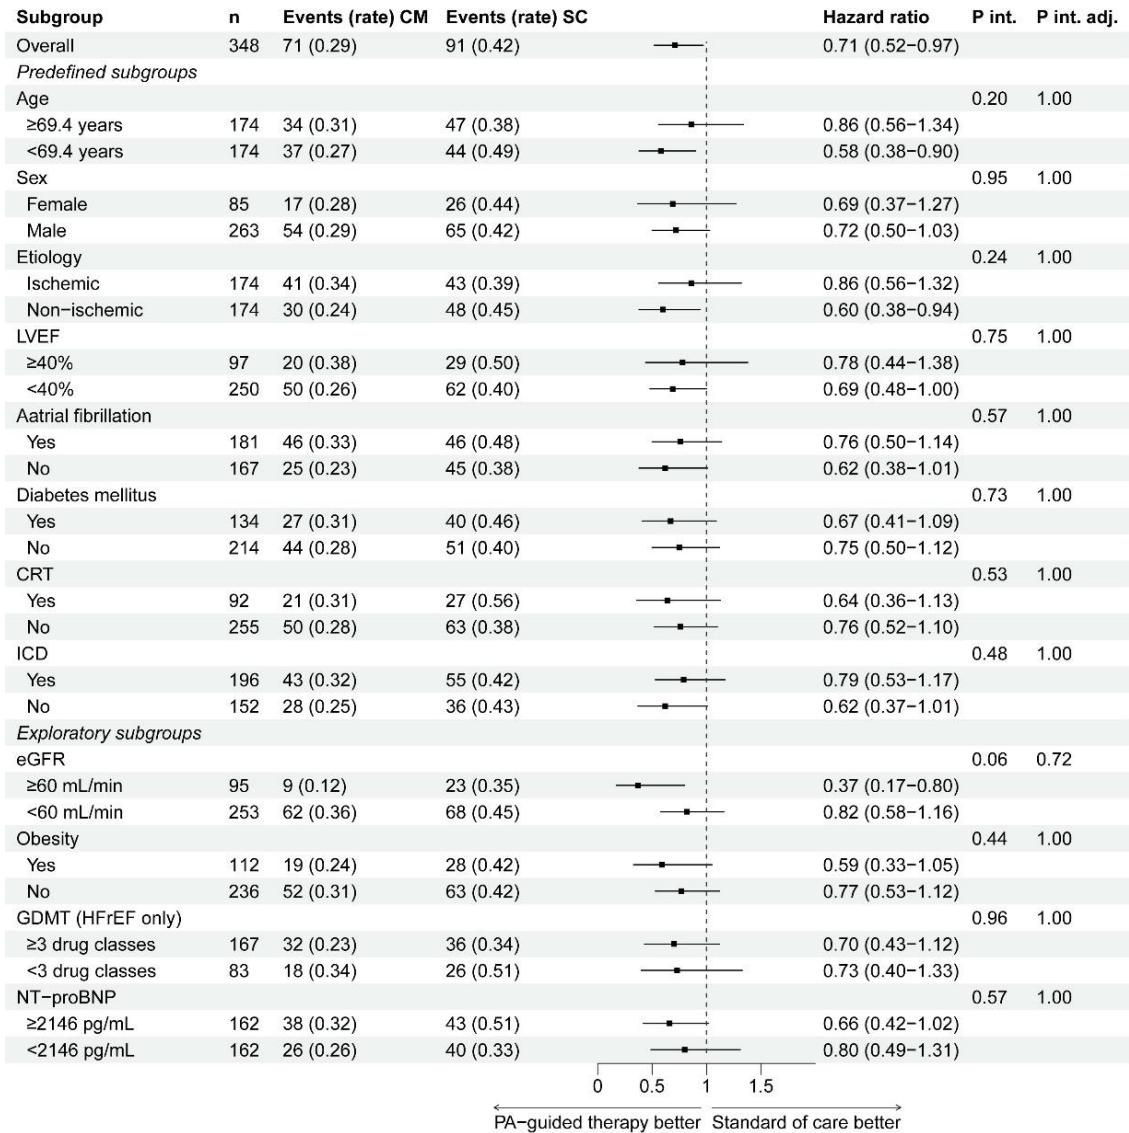

Rate: events/patient-year; CM: CardiMEMS (PA-guided therapy) group; SC: standard of care group; P int: P interaction; P int adj: Pinteraction adjusted; LVEF: left ventricular ejection fraction; CRT: cardiac resynchronization therapy; ICD: implantable cardiac defibrillator; eGFR: estimated glomerular filtration rate; GDMT: guideline-directed medical therapy; HFrEF: heart failure with a reduced ejection fraction.

Table S1. Full in- and exclusion criteria of MONITOR-HF.

| Inclusion criteria                                                                                                                                                                                                                                    | Exclusion criteria                                                                                                                                   |
|-------------------------------------------------------------------------------------------------------------------------------------------------------------------------------------------------------------------------------------------------------|------------------------------------------------------------------------------------------------------------------------------------------------------|
| 1. Written informed consent obtained from subject aged $\geq 18$ years.                                                                                                                                                                               | 1. Subjects with an active infection                                                                                                                 |
| 2. Diagnosis of chronic HF* ( $\geq 3$ months) in NYHA functional Class III with at least 1 HF hospitalization** or urgent visit with the necessity of intravenous (IV) diuretic therapy within 12 months of baseline visit (independent of EF %***). | 2. Subjects with history of recurrent ( $>1$ ) pulmonary embolism or deep vein thrombosis                                                            |
| 3. Subjects with reduced EF (HFrEF) should be treated according to National and International (ESC) guidelines* for optimal or maximum tolerated doses of GDMT HF medication and evaluated for ICD or CRT therapy, if indicated.                      | 3. Subjects who have had a major cardiovascular event (e.g., myocardial infarction, open heart surgery, stroke) within 2 months.                     |
| 4. Subjects with a BMI $\leq 35$ kg/m <sup>2</sup> . Subjects with BMI $>35$ kg/m <sup>2</sup> will require their chest circumference to be measured at the axillary level                                                                            | 4. Subjects with Cardiac Resynchronization Therapy device (CRT) implanted                                                                            |
| 5. Subjects willing and able to comply with the follow-up requirements of the study and able to comply with the daily readings.                                                                                                                       | 5. Subjects with a Glomerular Filtration Rate (GFR)                                                                                                  |
|                                                                                                                                                                                                                                                       | 6. Subjects with complex congenital heart disease or mechanical right heart valve(s)                                                                 |
|                                                                                                                                                                                                                                                       | 7. Subjects with known pulmonary arterial hypertension (WHO category 1 or 4/5) were PA pressure are most likely not responsive to cardiac treatment. |
|                                                                                                                                                                                                                                                       | 8. Subjects scheduled for or likely to undergo heart-transplantation or VAD within 6 months of baseline visit.                                       |
|                                                                                                                                                                                                                                                       | 9. Subjects with known coagulation disorders or allergy to aspirin, and/or clopidogrel                                                               |

\*according the ESC guidelines for heart failure 2016 definition for heart failure or subsequent versions of the ESC guidelines for heart failure 2021 during the course of the study and/or subsequent updates of recommendations in treatment of heart failure. \*\*defined as an unscheduled HF admission longer than 6 hours and/or use of i.v. diuretics. \*\*\*patients diagnosed with heart failure according to ESC guideline definitions with either HFrEF, HFmrEF and HFpEF are eligible for participation in the study. In line with GCP, a patient cannot participate in any other intervention study (WMO-plichtig onderzoek). Additionally, a patient cannot participate in any other intervention study or other active telemonitoring programme (on HF parameters) during the study.

NYHA: New York Heart Association; HF: heart failure; EF: ejection fraction; ESC: European Society of Cardiology; ICD: implantable cardioverter-defibrillator; CRT: cardiac resynchronization therapy; BMI: body mass index; GFR: glomerular filtration rate; PA: pulmonary artery.

Table S2. Baseline characteristics of MONITOR-HF (n=348, intention-to-treat population).

|                                                        | PA-guided therapy (n=176) | Standard of Care (n=172) |
|--------------------------------------------------------|---------------------------|--------------------------|
| Age                                                    | 69 (61-75)                | 70 (61-75)               |
| Sex                                                    |                           |                          |
| Male                                                   | 138 (78.4%)               | 125 (72.7%)              |
| Female                                                 | 38 (78.4%)                | 47 (27.3%)               |
| BMI, kg/m <sup>2</sup>                                 | 27.2 (24.4-31.6)          | 26.8 (24.1-31.0)         |
| Medical history                                        |                           |                          |
| Previous myocardial infarction                         | 81 (46.0%)                | 65 (37.8%)               |
| Previous percutaneous coronary intervention            | 74 (42.0%)                | 59 (34.3%)               |
| Previous coronary artery bypass graft surgery          | 34 (19.3%)                | 34 (19.8%)               |
| Diabetes                                               | 66 (37.5%)                | 68 (39.5%)               |
| Cerebrovascular accident or transient ischaemic attack | 29 (16.5%)                | 39 (22.7%)               |
| Atrial fibrillation                                    | 100 (56.8%)               | 81 (47.1%)               |
| Hypertension                                           | 102 (58.0%)               | 98 (57.0%)               |
| Months since last heart failure hospitalisation        | 3.6 (1.2-6.4)             | 3.4 (1.6-6.7)            |
| Years since heart failure diagnosis, median            | 3.4 (0.8-8.3)             | 3.8 (0.9-8.7)            |
| Etiology                                               |                           |                          |
| Ischaemic                                              | 93 (52.8%)                | 81 (47.1%)               |
| Heart rate, beats per min                              | 71 (64-81)                | 71 (64-80)               |
| Systolic blood pressure, mm Hg                         | 112 (103-129)             | 115 (104-131)            |
| Diastolic blood pressure, mm Hg                        | 68 (60-75)                | 68 (61-76)               |
| Left ventricular ejection fraction                     | 30 (23-40)                | 30 (22-43)               |
| <40%                                                   | 127 (72.7%)               | 123 (71.5%)              |
| ≥40%                                                   | 48 (27.3%)                | 49 (28.5%)               |
| Serum creatinine (µmol/L)                              | 127 (103-163)             | 124 (99-150)             |
| eGFR, mL/min                                           | 48 (35-60)                | 48 (38-63)               |
| Chronic kidney disease (eGFR <60)                      | 131 (74.4%)               | 121 (70.3%)              |
| NT-proBNP, pg/mL                                       | 2377 (837-5153)           | 1905 (691-4444)          |
| Intrinsic cardiac defibrillator                        | 94 (53.4%)                | 102 (59.3%)              |
| Cardiac resynchronisation therapy                      | 46 (26.1%)                | 46 (26.7%)               |
| Medical therapy                                        |                           |                          |
| Beta blocker                                           | 150 (85.2%)               | 142 (82.6%)              |
| Renin-angiotensin-aldosterone system inhibitor         | 154 (87.5%)               | 147 (85.5%)              |
| Angiotensin-converting enzyme inhibitor                | 37 (21.0%)                | 32 (18.6%)               |
| Angiotensin-receptor blocker                           | 26 (14.8%)                | 26 (15.1%)               |
| Angiotensin-receptor neprilysin inhibitor              | 81 (46.0%)                | 81 (47.1%)               |
| Hydralazine dinitrate                                  | 10 (5.7%)                 | 8 (4.7%)                 |
| Mineralocorticoid receptor antagonist                  | 143 (81.3%)               | 144 (83.7%)              |
| SGLT2 inhibitor                                        | 12 (6.8%)                 | 21 (12.2%)               |

|                            |             |             |
|----------------------------|-------------|-------------|
| Loop diuretic              | 168 (95.5%) | 167 (97.1%) |
| Thiazide diuretic          | 11 (6.3%)   | 10 (5.8%)   |
| Loop and thiazide diuretic | 11 (6.3%)   | 10 (5.8%)   |
| Ivabradin                  | 14 (8.0%)   | 10 (5.8%)   |
| Digoxin                    | 44 (25.0%)  | 39 (22.7%)  |

BMI: body mass index; eGFR: estimated glomerular filtration rate

Table S3. Baseline medical therapy use in HFrEF patients of MONITOR-HF (n=250, intention-to-treat population).

|                                                | PA-guided therapy (n=127) | Standard of Care (n=123) |
|------------------------------------------------|---------------------------|--------------------------|
| Beta blocker                                   | 111 (87.4%)               | 101 (82.1%)              |
| Renin-angiotensin-aldosterone system inhibitor | 115 (90.6%)               | 110 (89.4%)              |
| Angiotensin-converting enzyme inhibitor        | 25 (19.7%)                | 24 (19.5%)               |
| Angiotensin-receptor blocker                   | 17 (13.4%)                | 16 (13.0%)               |
| Angiotensin-receptor neprilysin inhibitor      | 68 (53.5%)                | 64 (52.0%)               |
| Hydralazine dinitrate                          | 5 (3.9%)                  | 6 (4.9%)                 |
| Mineralocorticoid receptor antagonist          | 109 (85.8%)               | 106 (86.2%)              |
| SGLT2 inhibitor                                | 11 (8.7%)                 | 16 (13.0%)               |
| Ivabradin                                      | 9 (9.7%)                  | 9 (7.3%)                 |
| Digoxin                                        | 34 (26.8%)                | 30 (24.4%)               |
| Loop diuretic                                  | 122 (96.1%)               | 119 (96.7%)              |
| Thiazide diuretic                              | 8 (6.3%)                  | 8 (6.5%)                 |
| Loop and thiazide diuretic                     | 8 (6.3%)                  | 8 (6.5%)                 |

Table S4. Detailed overview of quality of life endpoints.

|                      | n   | KCCQ OS at baseline (Cardio MEMS HF system) | KCCQ OS at baseline (Standard Care) | KCCQ OS at 12 months (Cardio MEMS HF system) | KCCQ OS at 12 months (Standard Care) | KCCQ OS mean difference at 12 months (95%CI) (between groups) | P int. | P int. adj. | KCCQ OS mean difference in change between baseline and 12 months (paired analysis) (95%CI) (Cardio MEMS HF system) | KCCQ OS mean difference in change between baseline and 12 months (paired analysis) (95%CI) (Standard Care) | KCCQ OS mean difference in change between baseline and 12 months (95%CI) (between groups) | Number of missing KCCQ values at 12 months (%) | P int. | P int. adj. |
|----------------------|-----|---------------------------------------------|-------------------------------------|----------------------------------------------|--------------------------------------|---------------------------------------------------------------|--------|-------------|--------------------------------------------------------------------------------------------------------------------|------------------------------------------------------------------------------------------------------------|-------------------------------------------------------------------------------------------|------------------------------------------------|--------|-------------|
| Overall              | 279 | 55.8 (23.3)                                 | 54.9 (22.3)                         | 66.1 (25.4)                                  | 56.9 (24.2)                          | 9.19 (3.33-15.05)                                             |        |             | 7.05 (2.77-11.33)                                                                                                  | -0.08 (-3.76-3.60)                                                                                         | 7.13 (1.51-12.75)                                                                         | 69 (19.8)                                      |        |             |
| Predefined subgroups |     |                                             |                                     |                                              |                                      |                                                               |        |             |                                                                                                                    |                                                                                                            |                                                                                           |                                                |        |             |
| Age ≥69.4            | 131 | 58.1 (22.2)                                 | 53.6 (22.2)                         | 65.1 (26.1)                                  | 57.5 (24.5)                          | 7.55 (-1.34-16.45)                                            | 0.61   | 1.00        | 2.56 (-2.50-7.62)                                                                                                  | 2.04 (-2.80-6.89)                                                                                          | 0.52 (-6.42-7.45)                                                                         | 43 (24.7)                                      | 0.03   | 0.33        |
| Age <69.4            | 148 | 53.9 (24.1)                                 | 56.4 (22.6)                         | 66.8 (25.0)                                  | 56.2 (24.1)                          | 10.60 (2.62-18.58)                                            |        |             | 10.36 (3.93-16.78)                                                                                                 | -2.29 (-7.93-3.36)                                                                                         | 12.64 (4.16-21.13)                                                                        | 26 (14.9)                                      |        |             |
| Female               | 74  | 53.2 (22.9)                                 | 49.3 (22.5)                         | 56.8 (28.0)                                  | 50.9 (25.9)                          | 5.90 (-6.81-18.6)                                             | 0.56   | 1.00        | 2.31 (-6.18-10.79)                                                                                                 | 0.55 (-6.86-7.96)                                                                                          | 1.76 (-9.31-12.83)                                                                        | 11 (12.9)                                      | 0.27   | 1.00        |
| Male                 | 205 | 56.6 (23.4)                                 | 57.0 (22.0)                         | 69.0 (23.9)                                  | 59.2 (23.3)                          | 9.77 (3.27-16.26)                                             |        |             | 8.57 (3.57-13.56)                                                                                                  | -0.33 (-4.62-3.97)                                                                                         | 8.89 (2.34-15.44)                                                                         | 58 (22.1)                                      |        |             |
| Ischemic etiology    | 131 | 57.1 (24.5)                                 | 52.6 (22.1)                         | 67.9 (25.6)                                  | 58.2 (19.9)                          | 9.63 (1.70-14.56)                                             | 0.86   | 1.00        | 6.18 (-0.22-12.57)                                                                                                 | 3.19 (-1.81-8.19)                                                                                          | 2.99 (-5.06-11.03)                                                                        | 43 (24.7)                                      | 0.18   | 1.00        |



|                       |     |             |             |             |             |                    |      |      |                    |                    |                     |            |       |      |
|-----------------------|-----|-------------|-------------|-------------|-------------|--------------------|------|------|--------------------|--------------------|---------------------|------------|-------|------|
| Non-ischemic etiology | 148 | 54.5 (21.8) | 56.9 (22.5) | 64.3 (25.2) | 55.8 (27.3) | 8.55 (0.00-17.11)  |      |      | 7.89 (2.03-13.76)  | -2.74 (-8.06-2.58) | 10.63 (2.78-18.49)  | 26 (14.9)  |       |      |
| LVEF ≥40              | 79  | 56.3 (22.8) | 52.6 (20.7) | 62.9 (27.9) | 51.0 (22.9) | 11.9 (0.17-23.65)  | 0.52 | 1.00 | 3.12 (-4.99-11.23) | -2.09 (-7.34-3.17) | 5.20 (-4.32-14.73)  | 18 (18.6)  | 0.71  | 1.00 |
| LVEF <40              | 200 | 55.8 (23.6) | 55.8 (23.0) | 67.2 (24.5) | 59.5 (24.5) | 7.69 (0.86-14.52)  |      |      | 8.41 (3.33-13.5)   | 0.81 (-4.01-5.63)  | 7.60 (0.64-14.56)   | 50 (20.0)  |       |      |
| AF                    | 141 | 57.7 (24.1) | 54.3 (23.0) | 64.3 (26.4) | 55.7 (24.8) | 8.57 (0.05-17.08)  | 0.77 | 1.00 | 2.84 (-2.70-8.38)  | 0 (-6.06-6.05)     | 2.84 (-5.30-10.98)  | 40 (22.1)  | 0.10  | 0.80 |
| No AF                 | 138 | 53.4 (22.1) | 55.4 (21.9) | 68.2 (24.2) | 57.9 (23.8) | 10.3 (2.13-18.47)  |      |      | 12.10 (5.49-18.71) | -0.14 (-4.68-4.40) | 12.24 (4.29-20.20)  | 29 (17.4)  |       |      |
| DM                    | 105 | 56.0 (25.2) | 50.7 (21.7) | 63.6 (25.5) | 57.0 (25.9) | 6.61 (-3.41-16.63) | 0.52 | 1.00 | 3.09 (-4.92-11.11) | 6.16 (0.49-11.83)  | -3.06 (-12.77-6.65) | 29 (21.6)  | 0.005 | 0.06 |
| No DM                 | 174 | 55.7 (22.2) | 57.6 (22.5) | 67.4 (25.4) | 56.8 (23.2) | 10.58 (3.30-17.86) |      |      | 9.16 (4.12-14.21)  | -4.26 (-8.98-0.47) | 13.42 (6.56-20.28)  | 40 (18.7)  |       |      |
| CRT                   | 72  | 57.0 (21.9) | 55.3 (20.4) | 60.8 (25.2) | 56.1 (25.0) | 4.69 (-7.10-16.48) | 0.38 | 1.00 | 0.73 (-7.20-8.67)  | -1.68 (-9.39-6.03) | 2.41 (-8.45-13.28)  | 20 (21.7)  | 0.32  | 1.00 |
| No CRT                | 206 | 55.4 (23.8) | 54.9 (23.1) | 68.0 (25.3) | 57.4 (24.0) | 10.61 (3.81-17.41) |      |      | 9.42 (4.34-14.50)  | 0.56 (-3.73-4.84)  | 8.86 (2.26-15.47)   | 49 (19.2)  |       |      |
| ICD                   | 160 | 56.9 (22.6) | 57.1 (21.4) | 65.7 (25.2) | 58.6 (24.1) | 7.10 (-0.65-14.84) | 0.40 | 1.00 | 7.75 (1.83-13.66)  | -1.49 (-6.26-3.27) | 9.24 (1.70-16.78)   | 36 (18.4%) | 0.38  | 1.00 |
| No ICD                | 119 | 54.6 (24.1) | 51.7 (23.4) | 66.5 (25.8) | 54.4 (24.4) | 12.15 (3.03-21.27) |      |      | 6.18 (-0.18-12.55) | 1.97 (-3.95-7.90)  | 4.21 (-4.39-12.81)  | 33 (21.7)  |       |      |
| Exploratory subgroups |     |             |             |             |             |                    |      |      |                    |                    |                     |            |       |      |
| eGFR ≥60              | 81  | 56.9 (22.9) | 53.1 (24.9) | 64.2 (24.2) | 59.9 (23.7) | 4.25 (-6.42-14.92) | 0.29 | 1.00 | 8.17 (1.23-15.12)  | 3.66 (-2.75-10.07) | 4.51 (-4.79-13.82)  | 14 (14.7)  | 0.55  | 1.00 |

|                 |     |             |             |             |             |                     |      |      |                    |                    |                     |           |      |      |
|-----------------|-----|-------------|-------------|-------------|-------------|---------------------|------|------|--------------------|--------------------|---------------------|-----------|------|------|
| eGFR <60        | 198 | 55.5 (23.5) | 55.7 (21.2) | 66.8 (25.9) | 55.6 (24.4) | 11.23 (4.16-18.3)   |      |      | 6.61 (1.25-11.98)  | -1.67 (-6.19-2.85) | 8.28 (1.31-15.26)   | 55 (21.7) |      |      |
| Obesity         | 91  | 51.5 (21.6) | 53.2 (22.6) | 64.4 (25.8) | 53.4 (24.6) | 10.98 (0.40-21.57)  | 0.66 | 1.00 | 7.76 (0.64-14.89)  | -0.05 (-7.10-7.00) | 7.81 (-2.07-17.70)  | 21 (18.8) | 0.87 | 1.00 |
| No obesity      | 188 | 58.0 (23.9) | 55.6 (22.3) | 66.8 (25.3) | 58.6 (24.0) | 8.16 (1.06-15.26)   |      |      | 6.73 (1.33-12.13)  | -0.09 (-4.42-4.24) | 6.82 (-0.06-13.70)  | 48 (20.3) |      |      |
| GDMT ≥3         | 144 | 57.5 (21.4) | 58.6 (21.8) | 67.9 (23.7) | 59.0 (24.9) | 8.91 (0.90-16.93)   | 0.55 | 1.00 | 8.11 (2.51-13.71)  | -1.77 (-7.46-3.91) | 9.88 (1.97-17.80)   | 23 (13.8) | 0.40 | 1.00 |
| GDMT <3         | 56  | 51.7 (28.2) | 51.1 (24.4) | 64.7 (27.4) | 60.4 (23.9) | 4.24 (-10.02-18.50) |      |      | 9.41 (-3.13-21.94) | 6.22 (-2.92-15.35) | 3.19 (-11.98-18.36) | 27 (32.5) |      |      |
| NTproB NP ≥2146 | 119 | 53.6 (23.0) | 53.3 (21.5) | 64.1 (25.7) | 55.5 (23.3) | 8.60 (-0.32-17.51)  | 0.97 | 1.00 | 7.38 (0.09-14.66)  | -0.31 (-6.70-6.09) | 7.69 (-1.91-17.28)  | 43 (26.5) | 0.85 | 1.00 |
| NTproB NP <2146 | 138 | 57.7 (22.6) | 57.5 (22.5) | 67.0 (25.4) | 58.6 (25.4) | 8.38 (-0.26-17.01)  |      |      | 6.02 (0.80-11.24)  | -0.57 (-5.11-3.98) | 6.59 (-0.27-13.44)  | 24 (14.8) |      |      |

KCCQ OS: Kansas City Cardiomyopathy Questionnaire overall summary score; P int: P interaction; P int adj: Pinteraction adjusted; LVEF: left ventricular ejection fraction; AF: atrial fibrillation; DM: diabetes mellitus; CRT: cardiac resynchronization therapy; ICD: implantable cardiac defibrillator; eGFR: estimated glomerular filtration rate; GDMT: guideline-directed medical therapy; HFREF: heart failure with a reduced ejection fraction.

Table S5. Detailed overview of clinical endpoints.

|                              | n   | Total HFH<br>(rate/pty)<br>(CardioME<br>MS HF<br>system) | Total HFH<br>(rate/pty)<br>(Standard<br>Care) | Total HFH<br>HR<br>(95% CI) | P int. | P int. adj. | Total HFH<br>and all-<br>cause<br>mortality<br>(rate/pty)<br>(CardioME<br>MS HF<br>system) | Total HFH<br>and all-<br>cause<br>mortality<br>(rate/pty)<br>(Standard<br>Care) | Total HFH<br>and all-<br>cause<br>mortality<br>HR<br>(95% CI) | P int. | P int. adj. |
|------------------------------|-----|----------------------------------------------------------|-----------------------------------------------|-----------------------------|--------|-------------|--------------------------------------------------------------------------------------------|---------------------------------------------------------------------------------|---------------------------------------------------------------|--------|-------------|
| Overall                      | 348 | 117 (0.38)                                               | 212 (0.68)                                    | 0.56 (0.38-0.84)            |        |             | 159 (0.52)                                                                                 | 257 (0.82)                                                                      | 0.63 (0.44-0.90)                                              |        |             |
| Predefined subgroups         |     |                                                          |                                               |                             |        |             |                                                                                            |                                                                                 |                                                               |        |             |
| Age ≥69.4                    | 174 | 45 (0.33)                                                | 85 (0.52)                                     | 0.64 (0.38-1.08)            | 0.50   | 1.00        | 66 (0.48)                                                                                  | 116 (0.71)                                                                      | 0.70 (0.45-1.09)                                              | 0.60   | 1.00        |
| Age <69.4                    | 174 | 72 (0.42)                                                | 127 (0.85)                                    | 0.49 (0.28-0.87)            |        |             | 93 (0.55)                                                                                  | 141 (0.94)                                                                      | 0.58 (0.34-0.97)                                              |        |             |
| Female                       | 85  | 27 (0.36)                                                | 65 (0.72)                                     | 0.51 (0.28-0.94)            | 0.74   | 1.00        | 33 (0.44)                                                                                  | 73 (0.80)                                                                       | 0.56 (0.30-1.02)                                              | 0.67   | 1.00        |
| Male                         | 263 | 90 (0.39)                                                | 147 (0.66)                                    | 0.58 (0.36-0.96)            |        |             | 126 (0.54)                                                                                 | 184 (0.83)                                                                      | 0.65 (0.43-1.00)                                              |        |             |
| Ischemic<br>etiology         | 174 | 75 (0.48)                                                | 76 (0.54)                                     | 0.89 (0.52-1.55)            | 0.02   | 0.24        | 104 (0.66)                                                                                 | 102 (0.72)                                                                      | 0.93 (0.58-1.47)                                              | 0.02   | 0.24        |
| Non-<br>ischemic<br>etiology | 174 | 42 (0.28)                                                | 136 (0.80)                                    | 0.36 (0.22-0.59)            |        |             | 55 (0.37)                                                                                  | 155 (0.91)                                                                      | 0.41 (0.25-0.67)                                              |        |             |
| LVEF ≥40                     | 97  | 33 (0.50)                                                | 63 (0.69)                                     | 0.70 (0.40-1.23)            | 0.42   | 1.00        | 44 (0.67)                                                                                  | 71 (0.78)                                                                       | 0.84 (0.50-1.41)                                              | 0.30   | 1.00        |
| LVEF <40                     | 250 | 84 (0.35)                                                | 149 (0.68)                                    | 0.53 (0.31-0.88)            |        |             | 114 (0.47)                                                                                 | 186 (0.84)                                                                      | 0.57 (0.37-0.90)                                              |        |             |
| AF                           | 181 | 72 (0.40)                                                | 108 (0.77)                                    | 0.54 (0.34-0.88)            | 0.89   | 1.00        | 95 (0.53)                                                                                  | 129 (0.92)                                                                      | 0.60 (0.39-0.93)                                              | 0.76   | 1.00        |
| No AF                        | 167 | 45 (0.35)                                                | 104 (0.60)                                    | 0.57 (0.28-1.18)            |        |             | 64 (0.50)                                                                                  | 128 (0.74)                                                                      | 0.67 (0.37-1.23)                                              |        |             |
| DM                           | 134 | 34 (0.32)                                                | 96 (0.73)                                     | 0.42 (0.23-0.77)            | 0.27   | 1.00        | 57 (0.53)                                                                                  | 118 (0.90)                                                                      | 0.58 (0.35-0.97)                                              | 0.67   | 1.00        |
| No DM                        | 214 | 83 (0.42)                                                | 116 (0.64)                                    | 0.67 (0.40-1.12)            |        |             | 102 (0.51)                                                                                 | 139 (0.77)                                                                      | 0.68 (0.43-1.09)                                              |        |             |

|                       |     |           |            |                  |      |      |            |            |                  |      |      |
|-----------------------|-----|-----------|------------|------------------|------|------|------------|------------|------------------|------|------|
| CRT                   | 92  | 42 (0.48) | 74 (1.05)  | 0.54 (0.23-1.24) | 0.66 | 1.00 | 52 (0.60)  | 93 (1.32)  | 0.52 (0.25-1.10) | 0.33 | 1.00 |
| No CRT                | 255 | 75 (0.34) | 136 (0.56) | 0.60 (0.39-0.91) |      |      | 107 (0.49) | 162 (0.67) | 0.72 (0.49-1.04) |      |      |
| ICD                   | 196 | 76 (0.43) | 143 (0.76) | 0.57 (0.33-0.98) | 1.00 | 1.00 | 97 (0.54)  | 171 (0.90) | 0.61 (0.38-0.99) | 0.70 | 1.00 |
| No ICD                | 152 | 41 (0.32) | 69 (0.56)  | 0.57 (0.33-0.97) |      |      | 62 (0.48)  | 86 (0.70)  | 0.69 (0.43-1.11) |      |      |
| Exploratory subgroups |     |           |            |                  |      |      |            |            |                  |      |      |
| eGFR $\geq$ 60        | 95  | 19 (0.23) | 55 (0.58)  | 0.40 (0.16-0.99) | 0.43 | 1.00 | 23 (0.28)  | 65 (0.69)  | 0.41 (0.17-0.97) | 0.28 | 1.00 |
| eGFR <60              | 253 | 98 (0.44) | 157 (0.72) | 0.61 (0.39-0.95) |      |      | 136 (0.61) | 192 (0.88) | 0.69 (0.47-1.02) |      |      |
| Obesity               | 112 | 23 (0.26) | 63 (0.60)  | 0.41 (0.22-0.77) | 0.34 | 1.00 | 37 (0.42)  | 70 (0.67)  | 0.61 (0.35-1.05) | 0.92 | 1.00 |
| No obesity            | 236 | 94 (0.43) | 149 (0.72) | 0.61 (0.38-1.01) |      |      | 122 (0.56) | 187 (0.90) | 0.63 (0.41-0.98) |      |      |
| GDMT $\geq$ 3         | 167 | 54 (0.32) | 87 (0.60)  | 0.53 (0.26-1.06) | 0.92 | 1.00 | 72 (0.42)  | 101 (0.70) | 0.61 (0.33-1.12) | 0.93 | 1.00 |
| GDMT <3               | 83  | 30 (0.44) | 64 (0.82)  | 0.53 (0.27-1.06) |      |      | 42 (0.61)  | 85 (1.09)  | 0.56 (0.30-1.04) |      |      |
| NTproBNP $\geq$ 2146  | 162 | 54 (0.39) | 116 (0.93) | 0.42 (0.25-0.70) | 0.12 | 1.00 | 82 (0.59)  | 143 (1.14) | 0.51 (0.32-0.82) | 0.16 | 1.00 |
| NTproBNP <2146        | 162 | 52 (0.40) | 80 (0.48)  | 0.82 (0.42-1.58) |      |      | 66 (0.50)  | 94 (0.57)  | 0.89 (0.49-1.59) |      |      |

HFH: heart failure hospitalization; pty: patient-year; HR: hazard ratio; P int: P interaction; P int adj: P interaction adjusted; LVEF: left ventricular ejection fraction; AF: atrial fibrillation; DM: diabetes mellitus; CRT: cardiac resynchronization therapy; ICD: implantable cardiac defibrillator; eGFR: estimated glomerular filtration rate; GDMT: guideline-directed medical therapy; HFrEF: heart failure with a reduced ejection fraction.

Table S5. Detailed overview of clinical endpoints (continued).

|                       | n   | Time to first HFH (rate) CardioME MS HF system | Time to first HFH (rate) Standard Care | Time to first HFH HR (95% CI) | P int. | P int. adj. | Time to first HFH or CV mortality (rate) (CardioME MS HF system) | Time to first HFH or CV mortality (rate) (Standard Care) | Time to first HFH or CV mortality HR (95% CI) | P int. | P int. adj. |
|-----------------------|-----|------------------------------------------------|----------------------------------------|-------------------------------|--------|-------------|------------------------------------------------------------------|----------------------------------------------------------|-----------------------------------------------|--------|-------------|
| Overall               | 348 | 63 (0.25)                                      | 85 (0.40)                              | 0.67 (0.49-0.93)              |        |             | 71 (0.29)                                                        | 91 (0.42)                                                | 0.71 (0.52-0.97)                              |        |             |
| Predefined subgroups  |     |                                                |                                        |                               |        |             |                                                                  |                                                          |                                               |        |             |
| Age ≥69.4             | 174 | 15 (0.14)                                      | 22 (0.18)                              | 0.82 (0.51-1.32)              | 0.22   | 1.00        | 34 (0.31)                                                        | 47 (0.38)                                                | 0.86 (0.56-1.34)                              | 0.20   | 1.00        |
| Age <69.4             | 174 | 25 (0.18)                                      | 25 (0.28)                              | 0.55 (0.35-0.86)              |        |             | 37 (0.27)                                                        | 44 (0.49)                                                | 0.58 (0.38-0.90)                              |        |             |
| Female                | 85  | 16 (0.26)                                      | 26 (0.44)                              | 0.64 (0.35-1.21)              | 0.91   | 1.00        | 17 (0.28)                                                        | 26 (0.44)                                                | 0.69 (0.37-1.27)                              | 0.95   | 1.00        |
| Male                  | 263 | 47 (0.25)                                      | 59 (0.38)                              | 0.69 (0.47-1.01)              |        |             | 54 (0.29)                                                        | 65 (0.42)                                                | 0.72 (0.50-1.03)                              |        |             |
| Ischemic etiology     | 174 | 34 (0.28)                                      | 37 (0.34)                              | 0.83 (0.52-1.32)              | 0.27   | 1.00        | 41 (0.34)                                                        | 43 (0.39)                                                | 0.86 (0.56-1.32)                              | 0.24   | 1.00        |
| Non-ischemic etiology | 174 | 29 (0.23)                                      | 48 (0.45)                              | 0.58 (0.36-0.91)              |        |             | 30 (0.24)                                                        | 48 (0.45)                                                | 0.60 (0.38-0.94)                              |        |             |
| LVEF ≥40              | 97  | 19 (0.36)                                      | 29 (0.50)                              | 0.74 (0.41-1.32)              | 0.81   | 1.00        | 20 (0.38)                                                        | 29 (0.50)                                                | 0.78 (0.44-1.38)                              | 0.75   | 1.00        |
| LVEF <40              | 250 | 44 (0.23)                                      | 56 (0.36)                              | 0.67 (0.45-1.00)              |        |             | 50 (0.26)                                                        | 62 (0.40)                                                | 0.69 (0.48-1.00)                              |        |             |
| AF                    | 181 | 41 (0.30)                                      | 45 (0.47)                              | 0.69 (0.45-1.05)              | 0.78   | 1.00        | 46 (0.33)                                                        | 46 (0.48)                                                | 0.76 (0.50-1.14)                              | 0.57   | 1.00        |
| No AF                 | 167 | 22 (0.20)                                      | 40 (0.34)                              | 0.61 (0.36-1.03)              |        |             | 25 (0.23)                                                        | 45 (0.38)                                                | 0.62 (0.38-1.01)                              |        |             |
| DM                    | 134 | 23 (0.26)                                      | 38 (0.44)                              | 0.60 (0.36-1.01)              | 0.54   | 1.00        | 27 (0.31)                                                        | 40 (0.46)                                                | 0.67 (0.41-1.09)                              | 0.73   | 1.00        |
| No DM                 | 214 | 40 (0.25)                                      | 47 (0.37)                              | 0.74 (0.48-1.13)              |        |             | 44 (0.28)                                                        | 51 (0.40)                                                | 0.75 (0.50-1.12)                              |        |             |

|                       |     |           |           |                  |      |      |           |           |                  |      |      |
|-----------------------|-----|-----------|-----------|------------------|------|------|-----------|-----------|------------------|------|------|
| CRT                   | 92  | 19 (0.28) | 25 (0.52) | 0.62 (0.34-1.14) | 0.62 | 1.00 | 21 (0.31) | 27 (0.56) | 0.64 (0.36-1.13) | 0.53 | 1.00 |
| No CRT                | 255 | 44 (0.24) | 59 (0.35) | 0.71 (0.48-1.05) |      |      | 50 (0.28) | 63 (0.38) | 0.76 (0.52-1.10) |      |      |
| ICD                   | 196 | 39 (0.29) | 52 (0.39) | 0.75 (0.50-1.14) | 0.45 | 1.00 | 43 (0.32) | 55 (0.42) | 0.79 (0.53-1.17) | 0.48 | 1.00 |
| No ICD                | 152 | 24 (0.21) | 33 (0.40) | 0.57 (0.34-0.97) |      |      | 28 (0.25) | 36 (0.43) | 0.62 (0.37-1.01) |      |      |
| Exploratory subgroups |     |           |           |                  |      |      |           |           |                  |      |      |
| eGFR $\geq$ 60        | 95  | 8 (0.11)  | 22 (0.34) | 0.34 (0.15-0.77) | 0.07 | 0.84 | 9 (0.12)  | 23 (0.35) | 0.37 (0.17-0.80) | 0.06 | 0.72 |
| eGFR <60              | 253 | 55 (0.32) | 63 (0.42) | 0.79 (0.55-1.13) |      |      | 62 (0.36) | 68 (0.45) | 0.82 (0.58-1.16) |      |      |
| Obesity               | 112 | 15 (0.19) | 28 (0.42) | 0.46 (0.25-0.87) | 0.16 | 1.00 | 19 (0.24) | 28 (0.42) | 0.59 (0.33-1.05) | 0.44 | 1.00 |
| No obesity            | 236 | 48 (0.28) | 57 (0.38) | 0.79 (0.53-1.15) |      |      | 52 (0.31) | 63 (0.42) | 0.77 (0.53-1.12) |      |      |
| GDMT $\geq$ 3         | 167 | 27 (0.19) | 32 (0.30) | 0.66 (0.39-1.10) | 0.82 | 1.00 | 32 (0.23) | 36 (0.34) | 0.70 (0.43-1.12) | 0.96 | 1.00 |
| GDMT <3               | 83  | 17 (0.32) | 24 (0.48) | 0.74 (0.40-1.39) |      |      | 18 (0.34) | 26 (0.51) | 0.73 (0.40-1.33) |      |      |
| NTproBNP $\geq$ 2146  | 162 | 32 (0.27) | 39 (0.46) | 0.61 (0.38-0.97) | 0.49 | 1.00 | 38 (0.32) | 43 (0.51) | 0.66 (0.42-1.02) | 0.57 | 1.00 |
| NTproBNP <2146        | 162 | 24 (0.24) | 38 (0.31) | 0.77 (0.46-1.29) |      |      | 26 (0.26) | 40 (0.33) | 0.80 (0.49-1.31) |      |      |

HFH: heart failure hospitalization; CV: cardiovascular; pty: patient-year; HR: hazard ratio; P int: P interaction; P int adj: P interaction adjusted; LVEF: left ventricular ejection fraction; AF: atrial fibrillation; DM: diabetes mellitus; CRT: cardiac resynchronization therapy; ICD: implantable cardiac defibrillator; eGFR: estimated glomerular filtration rate; GDMT: guideline-directed medical therapy; HF<sub>r</sub>EF: heart failure with a reduced ejection fraction.

Table S6. Detailed overview of pulmonary artery pressure endpoints.

|                          | n   | Mean PAP<br>AUC at 12<br>months | P int. | P int. adj. | mPAP at<br>baseline | mPAP at 12<br>months | mPAP mean<br>change (paired<br>analysis)<br>(95%CI) | P int. | P int. adj. |
|--------------------------|-----|---------------------------------|--------|-------------|---------------------|----------------------|-----------------------------------------------------|--------|-------------|
| Overall                  | 168 | -1624 (2003)                    |        |             | 33.3 (10.6)         | 24.9 (9.4)           | -6.46 (-7.97- -<br>4.94)                            |        |             |
| Predefined subgroups     |     |                                 |        |             |                     |                      |                                                     |        |             |
| Age ≥69.4                | 74  | -1728 (1971)                    | 0.55   | 1.00        | 35.4 (9.89)         | 27.6 (9.89)          | -6.59 (-9.10- -<br>4.08)                            | 0.89   | 1.00        |
| Age <69.4                | 94  | -1543 (2035)                    |        |             | 31.6 (10.9)         | 23.0 (8.51)          | -6.36 (-8.29- -<br>4.43)                            |        |             |
| Female                   | 37  | -1094 (1540)                    | 0.03   | 0.33        | 30.8 (11.6)         | 25.1 (10.3)          | -3.86 (-5.79- -<br>1.93)                            | 0.01   | 0.12        |
| Male                     | 131 | -1775 (2097)                    |        |             | 34.0 (10.3)         | 24.9 (9.12)          | -7.25 (-9.13 - -<br>5.38)                           |        |             |
| Ischemic<br>etiology     | 88  | -1636 (2074)                    | 0.93   | 1.00        | 35.0 (10.9)         | 25.8 (8.96)          | -6.44 (-8.73- -<br>4.15)                            | 0.98   | 1.00        |
| Non-ischemic<br>etiology | 80  | -1610 (1934)                    |        |             | 31.4 (10.0)         | 24.0 (9.77)          | -6.48 (-8.52- -<br>4.44)                            |        |             |
| LVEF ≥40                 | 46  | -1104 (1703)                    | 0.02   | 0.24        | 32.6 (9.82)         | 25.7 (8.69)          | -4.32 (-7.07 - -<br>1.57)                           | 0.08   | 0.80        |
| LVEF <40                 | 121 | -1830 (2079)                    |        |             | 33.4 (10.9)         | 24.7 (9.62)          | -7.18 (-8.98- -<br>5.37)                            |        |             |
| AF                       | 95  | -1576 (1908)                    | 0.73   | 1.00        | 34.6 (9.85)         | 26.7 (9.59)          | -6.11 (-8.11- -<br>4.12)                            | 0.62   | 1.00        |
| No AF                    | 73  | -1686 (2131)                    |        |             | 31.6 (11.4)         | 22.6 (8.63)          | -6.9 (-9.30- -<br>4.50)                             |        |             |
| DM                       | 61  | -1778 (1959)                    | 0.45   | 1.00        | 34.5 (9.42)         | 27.0 (8.95)          | -5.63 (-8.07- -<br>3.19)                            | 0.42   | 1.00        |
| No DM                    | 107 | -1535 (2032)                    |        |             | 32.6 (11.2)         | 23.8 (9.46)          | -6.90 (-8.86- -<br>4.94)                            |        |             |
| CRT                      | 45  | -1493 (1956)                    | 0.60   | 1.00        | 33.0 (9.34)         | 25.8 (8.47)          | -5.89 (-8.73- -<br>3.05)                            | 0.65   | 1.00        |
| No CRT                   | 123 | -1672 (2027)                    |        |             | 33.4 (11.1)         | 24.6 (9.69)          | -6.66 (-8.48- -<br>4.84)                            |        |             |

|                       |     |              |        |       |             |             |                       |        |       |
|-----------------------|-----|--------------|--------|-------|-------------|-------------|-----------------------|--------|-------|
| ICD                   | 92  | -1722 (1985) | 0.49   | 1.00  | 33.6 (10.2) | 24.4 (8.59) | -7.31 (-9.49- -5.14)  | 0.23   | 1.00  |
| No ICD                | 76  | -1503 (2033) |        |       | 32.9 (11.2) | 25.5 (10.2) | -5.46 (-7.58- -3.33)  |        |       |
| Exploratory subgroups |     |              |        |       |             |             |                       |        |       |
| Baseline mPAP >25     | 93  | -2112 (2295) | 0.0002 | 0.003 | 39.6 (7.88) | 29.3 (8.72) | -9.18 (-11.72- -6.64) | 0.0004 | 0.006 |
| Baseline mPAP ≤25     | 69  | -987 (1376)  |        |       | 25.0 (8.22) | 20.8 (8.38) | -3.56 (-5.24- -1.87)  |        |       |
| eGFR ≥60              | 43  | -1374 (1541) | 0.27   | 1.00  | 27.8 (10.5) | 20.6 (8.26) | -5.04 (-6.90- -3.18)  | 0.15   | 1.00  |
| eGFR <60              | 125 | -1711 (2139) |        |       | 35.2 (10.0) | 26.7 (9.26) | -7.03 (-9.02- -5.03)  |        |       |
| Obesity               | 54  | -1428 (1756) | 0.36   | 1.00  | 32.8 (9.94) | 27.1 (7.27) | -4.08 (-6.22- -1.93)  | 0.02   | 0.22  |
| No obesity            | 114 | -1715 (2110) |        |       | 33.5 (10.9) | 24.0 (10.0) | -7.46 (-9.39- -5.52)  |        |       |
| GDMT ≥3               | 88  | 1734 (2014)  | 0.43   | 1.00  | 32.5 (10.8) | 24.3 (8.73) | -6.52 (-8.52- -4.51)  | 0.26   | 1.00  |
| GDMT <3               | 33  | 2088 (2257)  |        |       | 35.8 (11.0) | 25.7 (12.0) | -9.09 (-13.27- -4.93) |        |       |
| NTproBNP ≥2146        | 82  | -2183 (2166) | 0.001  | 0.01  | 37.2 (9.41) | 26.3 (8.54) | -9.15 (-11.45- -6.84) | 0.003  | 0.04  |
| NTproBNP <2146        | 73  | -1147 (1767) |        |       | 29.5 (11.0) | 23.1 (10.2) | -4.38 (-6.55- -2.22)  |        |       |
| PVR >2                | 65  | -2038 (2087) | 0.09   | 0.90  | 37.5 (9.25) | 27.6 (8.46) | -8.49 (-10.94- -6.05) | 0.11   | 0.99  |
| PVR ≤2                | 88  | -1462 (2000) |        |       | 30.5 (10.2) | 23.2 (9.67) | -5.85 (-8.03- -3.68)  |        |       |

PAP AUC: pulmonary artery pressure area under the curve (mmHg.days); mPAP: mean pulmonary artery pressure (mmHg); 12M: 12 months; P int: P interaction; P int adj: P interaction adjusted; LVEF: left ventricular ejection fraction; AF: atrial fibrillation; DM: diabetes mellitus; CRT: cardiac resynchronization therapy; ICD: implantable cardiac defibrillator; eGFR: estimated glomerular filtration rate; GDMT: guideline-directed medical therapy; HFrEF: heart failure with a reduced ejection fraction; PVR: peripheral vascular resistance.
